# Supplementary material for: Interplay between MycN and c-Myc regulates radioresistance and cancer stem cell phenotype in neuroblastoma upon glutamine deprivation
Source: PubMed Central journal article supplement (PMC7255021; doi:10.7150/thno.42602), 2020-05-16
Supplement: thnov10p6411s1.pdf [file thnov10p6411s1.pdf]

## SUPPLEMENTARY DATA

**Supplementary Figure 1:** (A) Growth inhibition assay performed on two neuroblastoma cell lines using Alamar Blue after 72 h incubation with a range of concentrations of CB-839 ( $n \geq 3$ ;  $\pm$  S.E.M). (B) Western blot analysis of ectopic MycN expression in protein extracts from SHEP/TET21N inducible cell line, SH-SY5Y and SK-N-AS cell lines transfected with empty control pCDH vector or pMYCN vector. GAPDH was used as a loading control. (C, E, G) Cell number and (D, F, H) cell viability performed using Trypan Blue Dye exclusion assay on neuroblastoma cells with ectopic MycN expression cultured with or without glutamine from 24 to 72 h. Data are reported as averages ( $n \geq 3$ ;  $\pm$  S.E.M; ns  $p > 0.05$ ; \* $p < 0.05$ ; \*\* $p < 0.01$ ).

**Supplementary Figure 2:** (A) Plating efficiency of neuroblastoma cells upon 24 h glutamine deprivation ( $n \geq 3$ ;  $\pm$  S.E.M). (B) Radiobiological colony forming assay of SH-SY5Y cells upon 48 h glutamine deprivation ( $n \geq 3$ ;  $\pm$  S.E.M). (C) Radiobiological colony forming assay of SK-N-AS cells upon 24 or 48 h glutamine deprivation ( $n \geq 3$ ;  $\pm$  S.E.M; \*\*\* $p < 0.001$ ). (D) Radiobiological colony forming assay of BE(2)-C cells upon 48 h glutamine deprivation ( $n \geq 3$ ;  $\pm$  S.E.M; \*\* $p < 0.01$ ). (E) Radiobiological colony forming assay of Kelly cells upon 24 or 48 h glutamine deprivation ( $n \geq 3$ ;  $\pm$  S.E.M; \*\*\* $p < 0.001$ ). (F) Growth inhibition assay performed on two neuroblastoma cell lines using Alamar Blue after 72 h incubation with a range of concentrations of topotecan following 48 h glutamine deprivation ( $n \geq 3$ ;  $\pm$  S.E.M). (G) Plating efficiency of SK-N-AS and SH-SY5Y cells with ectopic MycN expression upon 24 h glutamine deprivation ( $n \geq 3$ ;  $\pm$  S.E.M). (H, I) Radiobiological colony forming assay of (H) SH-SY5Y cells and (I) SK-N-AS cells with ectopic MycN expression upon 24 h glutamine deprivation ( $n \geq 3$ ;  $\pm$  S.E.M; ns  $p > 0.05$ ).

**Supplementary Figure 3:** (A) Plating efficiency of BE(2)-C cells upon 24 h glutamine deprivation and *MYCN* downregulation ( $n \geq 3$ ;  $\pm$  S.E.M). (B, C) Radiobiological colony forming assay of BE(2)-C cells following *MYCN* downregulation (B) with glutamine or (C) upon 24 h glutamine deprivation ( $n \geq 3$ ;  $\pm$  S.E.M; ns  $p > 0.05$ ; \*\* $p < 0.01$ ). (D) Plating efficiency of BE(2)-C and SH-SY5Y cells upon 24 h glutamine deprivation and *c-MYC* downregulation ( $n \geq 3$ ;  $\pm$  S.E.M). (E, F) Radiobiological colony forming assay of BE(2)-C cells following *c-MYC* downregulation (E) with glutamine or (F) upon 24 h glutamine deprivation ( $n \geq 3$ ;  $\pm$  S.E.M; ns  $p > 0.05$ ). (G, H) Radiobiological colony forming assay of SH-SY5Y cells following *c-MYC* downregulation (G) with glutamine or (H) upon 24 h glutamine deprivation ( $n \geq 3$ ;  $\pm$  S.E.M; ns  $p > 0.05$ ).

**Supplementary Figure 4:** (A, B) Relative mRNA expression of (A) *MYCN* and (B) *c-MYC* following *MYCN* and *c-MYC* downregulation upon glutamine deprivation in BE(2)-C cells. (C, D) Relative mRNA expression of (C) *c-MYC* and (D) *MYCN* following *MYCN* and *c-MYC* downregulation upon glutamine deprivation in SH-SY5Y cells ( $n = 3$ ; \* $p < 0.05$ ; \*\* $p < 0.01$ ). (E) Plating efficiency of BE(2)-C and SH-SY5Y cells upon 24 h glutamine deprivation and *MYCN* and *c-MYC* downregulation ( $n \geq 3$ ;  $\pm$  S.E.M).

**Supplementary Figure 5:** (A, B) Correlation of mRNA expression for (A) 6 genes downregulated and (B) 4 genes upregulated upon glutamine deprivation with overall survival of neuroblastoma patients from the TARGET study. Median cut-off used; green is low gene expression level ( $n = 124$ ) and red is high gene expression level ( $n = 125$ ).

**Supplementary Figure 6:** (A) Representative western blot of total Chk1 and p-Chk1 levels

in BE(2)-C cells following 48 h prexasertib treatment. GAPDH was used as a loading control. (B, C) Relative mRNA expression of 8 antioxidant genes upon glutamine deprivation and irradiation in (B) BE(2)-C and (C) SH-SY5Y cells ( $n = 3$ ; \* $p < 0.05$ ; \*\* $p < 0.01$ ). (D) Relative gene expression changes of 3 antioxidant genes between BE(2)-C and SH-SY5Y cells (\* $p < 0.05$ ; \*\* $p < 0.01$ ).

**Supplementary Figure 7:** (A) Correlation of mRNA expression for 84 CSC-related genes with *c-Myc* and *MYCN* in neuroblastoma TARGET patient cohort. (B) Correlation of *PROM1* mRNA expression with overall survival of neuroblastoma patients from the TARGET study. Scan cut-off; green is low gene expression level ( $n = 179$ ) and red is high gene expression level ( $n = 68$ ). (C) Validation of *c-MYC* knockdown in BE(2)-C and SH-SY5Y cells ( $n \geq 3$ ;  $\pm$  S.D; \*\* $p < 0.01$ ; \*\*\* $p < 0.001$ ). (D) Validation of *MYCN* knockdown in BE(2)-C and SH-SY5Y cells ( $n \geq 3$ ;  $\pm$  S.D; \*\*\* $p < 0.001$ ). (E) Representative western blot of ALDH1A3 and CD44 levels in SH-SY5Y, BE(2)-C and Kelly cells upon glutamine deprivation. GAPDH was used as a loading control. (F) Sphere forming assay of BE(2)-C cells following *MYCN* downregulation upon 24 h glutamine deprivation and 4 Gy X-rays. Data are reported as averages normalised to 0 Gy ( $n \geq 3$ ;  $\pm$  S.E.M; ns  $p > 0.05$ ; \*\* $p < 0.01$ ).

**Supplementary Figure 8:** (A, B) Correlation of mRNA expression for *ALDH1A1* with (A) *c-MYC* or (B) *MYCN*. R-values were determined using Pearson and Spearman correlation test. (C) Flow cytometry analysis of ALDH positive population in SH-SY5Y cells upon glutamine deprivation. ( $n \geq 3$ ;  $\pm$  S.E.M).

**Supplementary Table 1:** Sequences of siRNAs and oligonucleotides and list of antibodies

**Supplementary Table 2:** DNA repair genes deregulated ( $> 1.5$ -fold change) in BE(2)-C upon glutamine deprivation for 24 h. A pooled analysis was performed with two independent biological repeats. Gene expression data was normalized to expression of five reference genes (*ACTB*, *GAPDH*, *B2M*, *RPLP0*, and *HPRT1*).

**Supplementary Table 3:** CSC-related genes deregulated ( $> 1.5$ -fold change) in BE(2)-C and SH-SY5Y cells upon glutamine deprivation for 24 h. A pooled analysis was performed with two independent biological repeats. Gene expression data was normalized to expression of five reference genes (*ACTB*, *GAPDH*, *B2M*, *RPLP0*, and *HPRT1*).

Table S1. Nucleotide sequences of siRNAs, primers used for qPCR and antibodies used for Western blotting and flow cytometry

| <b>siRNA</b>                   | <b>Nucleotide sequence</b>                                                                                          |
|--------------------------------|---------------------------------------------------------------------------------------------------------------------|
| c-Myc #1                       | 5'-GGAACGAGCUAAAACGGAG-3'                                                                                           |
| c-Myc #2                       | 5'-GGAGGAGAACUUCUACCAG-3'                                                                                           |
| MycN #5                        | 5'-CGGACGAAGAUGACUUCUATT -3'                                                                                        |
| MycN #6                        | 5'-UGCCGGAGUUGGUAAAAGAATT-3'                                                                                        |
| MycN #3                        | 5'-GGCCACUGAGUAUGUCCACTC-3'                                                                                         |
| c-Myc SMARTpool                | 5'-ACGGAACUCUUGUGCGUAA-3';<br>5'-GAACACACAACGUCUUGGA-3';<br>5'-AACGUUAGCUUCACCAACA-3';<br>5'-CGAUGUUGUUUCUGUGGAA-3' |
| <b>Blank</b>                   |                                                                                                                     |
| <b>Oligonucleotide primers</b> | <b>Nucleotide sequences</b>                                                                                         |
| c-Myc                          | Forward: 5'-CTCCGTCCTCGGATTCTCTGC-3'<br>Reverse: 5'-CTCCAGCAGAAGGTGATCCAG-3'                                        |
| MycN                           | Forward: 5'-CCTGAGCGATTCAGATGATG-3'<br>Reverse: 5'-CTTGGGACGCACAGTGATGG-3'                                          |
| ACTB                           | Forward: 5'-ATGGAGTCCTGTGGCATCCA-3'<br>Reverse: 5'-AGTACTTGCCTCAGGAGGA-3'                                           |
| ALDH1A2                        | Forward: 5'-TTGCAGGGCGTCATCAAAC-3'<br>Reverse: 5'-ACACTCCAATGGGTTCATGTC-3'                                          |
| ALDH1A3                        | Forward: 5'-TCTCGACAAAGCCCTGAAGT-3'<br>Reverse: 5'-TATTCGGCAAAGCGTATTC-3'                                           |
| CD133/PROM1                    | Forward: 5'-GGATTATTCTATGCTGTGTCCTG-3'<br>Reverse: 5'-TGCCACAAAACCATAGAAGAT-3'                                      |
| EXO1                           | Forward: 5'-AACTAGCCAAAGGTGAACCTACT-3'<br>Reverse: 5'-TGTGATATTGATAGACCGGGTGA-3'                                    |
| BRIP1                          | Forward: 5'-CTTACCCGTCACAGCTTGCTA-3'<br>Reverse: 5'-CACTAAGAGATTGTTGCCATGCT-3'                                      |
| LIG1                           | Forward: 5'-GCCCTGCTAAAGGCCAGAAG-3'<br>Reverse: 5'-CATGGGAGAGGTGTCAGAGAG-3'                                         |
| UNG                            | Forward: 5'-CCCACACCAAGTCTTCACC-3'<br>Reverse: 5'-TTGAACACTAAAGCAGAGCC-3'                                           |
| RAD54L                         | Forward: 5'-TTGAGTCAGCTAACCAATCAACC-3'<br>Reverse: 5'-GGAGGCTCATAACAGAACCAAGG-3'                                    |
| CHK1                           | Forward: 5'-CCAGATGCTCAGAGATTCTTCCA-3'<br>Reverse: 5'-TGTTCAACAAACGCTCACGATTA-3'                                    |
| BRCA2                          | Forward: 5'-CCACCACCACACAGAATTCT-3'<br>Reverse: 5'-ATGCAATAAACCTGAATCAGC-3'                                         |
| GCLC                           | Forward: 5'-CAGGAAGGCATTGATCATCTC-3'<br>Reverse: 5'-CCATGGGTCGAAATTCTACTC-3'                                        |
| GSR                            | Forward: 5'-ACACTGGGACTCACGGAAG-3'<br>Reverse: 5'-CTGCATATCGATCCCAACCAC-3'                                          |
| SOD2                           | Forward: 5'-GGTTTTGGGGTATCTGGGCTCCA-3'<br>Reverse: 5'-CTTGGCCAACGCCTCCTGGTA-3'                                      |
| CAT                            | Forward: 5'-ACGTCTGTCTGAGAACATTG-3'<br>Reverse: 5'-CTTAGGGTTCTCAGCATTGTA-3'                                         |

|                                 |                                                                                |
|---------------------------------|--------------------------------------------------------------------------------|
| PRDX6                           | Forward: 5'-GACTGCCCTTTCAATAGACAG-3'<br>Reverse: 5'-CCCTTTTCATCCTTCTCTGC-3'    |
| GCLM                            | Forward: 5'-CGAGGAGCTTCATGATTGTATCC-3'<br>Reverse: 5'-CCATGTCAACTGCACTTCTAG-3' |
| GGT1                            | Forward: 5'-GATGCCAACCAGTGCTCGAAG-3'<br>Reverse: 5'-GACCTCAGCTTTTCGTGTGG-3'    |
| GPX1                            | Forward: 5'-GAGAACCCCAAGAACGAAGAG-3'<br>Reverse: 5'-GCTTGGGGTCGGTCATAAG-3'     |
| <b>Antibodies / application</b> |                                                                                |
| <b>Manufacturer ID</b>          |                                                                                |
| ALDH1A3 / Western blotting      | Sigma-Aldrich, HPA046271, #ABN427                                              |
| CD44 / Western blotting         | Santa Cruz Biotechnology, HCAM (F-4), #sc-9960                                 |
| Chk1 / Western blotting         | Cell Signaling Technology, #2360 S                                             |
| pChk1 S296 / Western blotting   | Cell Signaling Technology, #2349 P                                             |
| GAPDH / Western blotting        | Abcam, #ab8245                                                                 |
| MycN / Western blotting         | SantaCruz, #sc-53993                                                           |
| c-Myc / Western blotting        | <b>Cell signaling, #9402S</b>                                                  |
| PARP / Western blotting         | Cell Signaling 46D11, #9532S                                                   |
| cleaved-PARP / Western blotting | Cell Signaling D64E10, #5625S                                                  |
| NANOG / Western blotting        | Cell Signaling, #3580                                                          |
| Oct4 / Western blotting         | Cell Signaling, #2750                                                          |
| CD133-PE / flow cytometry       | Miltenyi Biotec, clone 293C3, #5181106100                                      |
| CD117-PE / flow cytometry       | Miltenyi Biotec, clone A3C6E2, #5181106146                                     |
| IgG2b-PE / flow cytometry       | Miltenyi Biotec, #5181106018                                                   |
| IgG-PE / flow cytometry         | Miltenyi Biotec, #5181106103                                                   |

**Supplementary Table 2**

| <b>BE(2)C cells</b> |                                                  |
|---------------------|--------------------------------------------------|
| Gene Symbol         | FC normalized, -<br>Glutamine vs. +<br>Glutamine |
| ERCC4               | 3.21513                                          |
| MSH4                | 2.89396                                          |
| NEIL1               | 2.47493                                          |
| POLL                | 2.36075                                          |
| CCNO                | 2.22598                                          |
| PARP3               | 2.0607                                           |
| XPC                 | 1.93042                                          |
| CDK7                | 1.89513                                          |
| ERCC1               | 1.82668                                          |
| RAD52               | 1.81086                                          |
| PMS2                | 1.79522                                          |
| LIG4                | 1.72232                                          |
| ATXN3               | 1.70599                                          |
| ERCC5               | 1.70198                                          |
| DDB2                | 1.54392                                          |
| MUTYH               | 1.52226                                          |
| BRCA2               | 0.64222                                          |
| PARP1               | 0.64061                                          |
| POLD3               | 0.63606                                          |
| PRKDC               | 0.63483                                          |
| FEN1                | 0.59619                                          |
| MRE11A              | 0.58675                                          |
| NTHL1               | 0.56361                                          |
| RPA1                | 0.55873                                          |
| MSH6                | 0.53933                                          |
| XRCC6BP1            | 0.50634                                          |
| EXO1                | 0.49386                                          |
| XRCC2               | 0.44326                                          |
| BRIP1               | 0.43229                                          |
| DMC1                | 0.42506                                          |
| LIG1                | 0.40338                                          |
| UNG                 | 0.34595                                          |
| RAD54L              | 0.28717                                          |

**Supplementary Table 3**

| <b>BE(2)C cells</b> |                                | <b>SH-SY5Y cells</b> |                                |
|---------------------|--------------------------------|----------------------|--------------------------------|
| Gene Symbol         | FC normalized, - Gln vs. + Gln | Gene Symbol          | FC normalized, - Gln vs. + Gln |
| PROM1               | 17.28438                       | KLF4                 | 5.834816                       |
| MYC                 | 12.5978                        | AXL                  | 3.85999                        |
| ABCB5               | 11.43151                       | ABCB5                | 3.597756                       |
| KLF4                | 7.116205                       | MS4A1                | 3.078209                       |
| ALDH1A1             | 5.575478                       | ITGA2                | 2.294654                       |
| YAP1                | 4.201265                       | ABCG2                | 2.225608                       |
| ITGA6               | 3.680077                       | MUC1                 | 2.173072                       |
| ERBB2               | 3.360114                       | IL8                  | 2.143426                       |
| IL8                 | 2.844567                       | TAZ                  | 2.051051                       |
| AXL                 | 2.463906                       | ALCAM                | 2.039392                       |
| WNT1                | 2.428304                       | ALDH1A1              | 2.016397                       |
| EPCAM               | 2.407676                       | TGFBR1               | 1.979288                       |
| DLL1                | 2.181817                       | ERBB2                | 1.977277                       |
| ITGA2               | 2.111061                       | JAK2                 | 1.928972                       |
| JAK2                | 2.056308                       | DKK1                 | 1.916037                       |
| KLF17               | 1.928385                       | ITGA6                | 1.89101                        |
| MUC1                | 1.710341                       | EPCAM                | 1.865814                       |
| PTPRC               | 1.636532                       | ATXN1                | 1.814993                       |
| TAZ                 | 1.540456                       | DDR1                 | 1.703605                       |
| JAG1                | 1.531764                       | MERTK                | 1.667524                       |
| ABCG2               | 0.652738                       | PLAT                 | 1.541546                       |
| NANOG               | 0.647073                       | FLOT2                | 1.535867                       |
| CHEK1               | 0.637661                       | WEE1                 | 0.666291                       |
| SNAI1               | 0.634334                       | NOS2                 | 0.635919                       |
| KIT                 | 0.564193                       | WWC1                 | 0.62265                        |
| MYCN                | 0.50647                        | KITLG                | 0.601951                       |
| LIN28B              | 0.501862                       | JAG1                 | 0.593522                       |
| DNMT1               | 0.486316                       | SNAI1                | 0.566271                       |
| MS4A1               | 0.460024                       | CD38                 | 0.372905                       |
| FZD7                | 0.458467                       | PROM1                | 0.2781                         |
| CD24                | 0.452182                       | KIT                  | 0.244557                       |
| SOX2                | 0.414181                       | MYC                  | 0.140218                       |
| TWIST1              | 0.411908                       |                      |                                |
| WEE1                | 0.379966                       |                      |                                |
| NOS2                | 0.376196                       |                      |                                |
| CD44                | 0.35879                        |                      |                                |
| SMO                 | 0.357417                       |                      |                                |
| ATXN1               | 0.284906                       |                      |                                |
| CD38                | 0.278292                       |                      |                                |
| FGFR2               | 0.220686                       |                      |                                |
| KITLG               | 0.151845                       |                      |                                |
| PLAUR               | 0.148664                       |                      |                                |

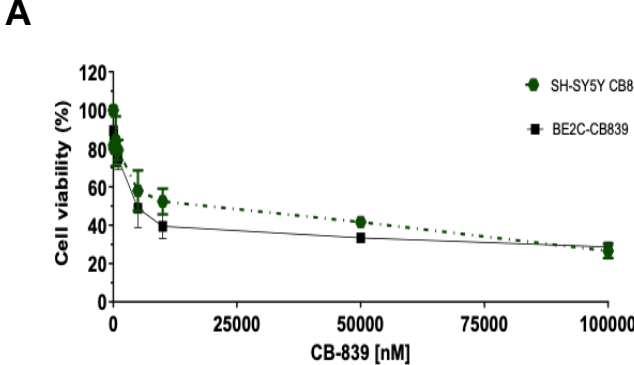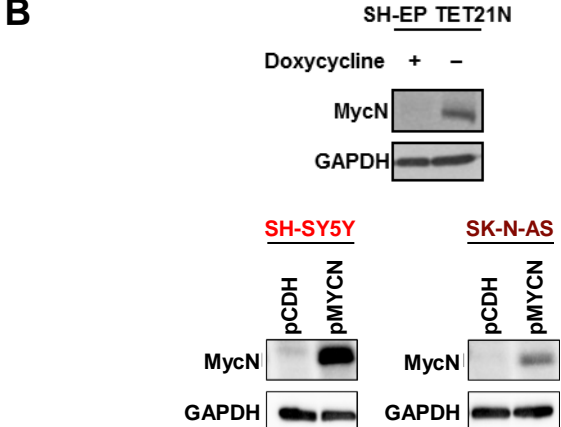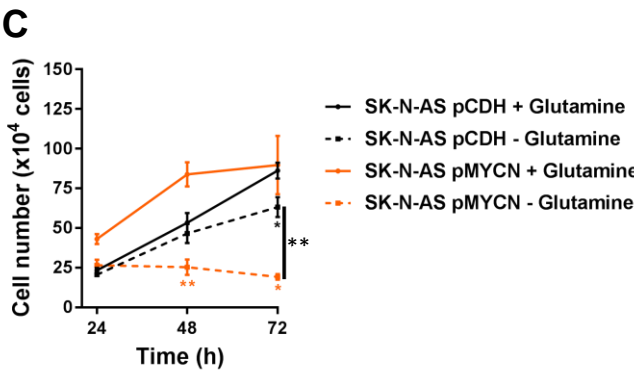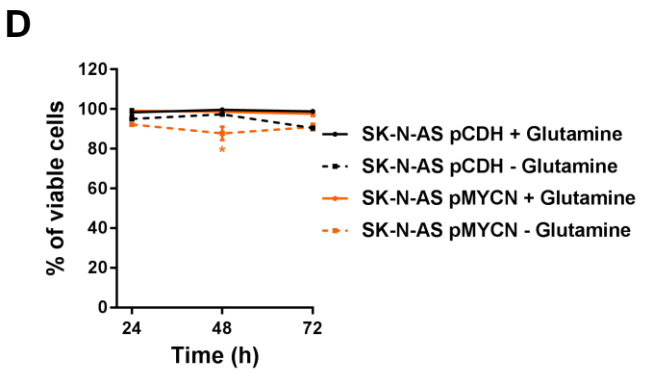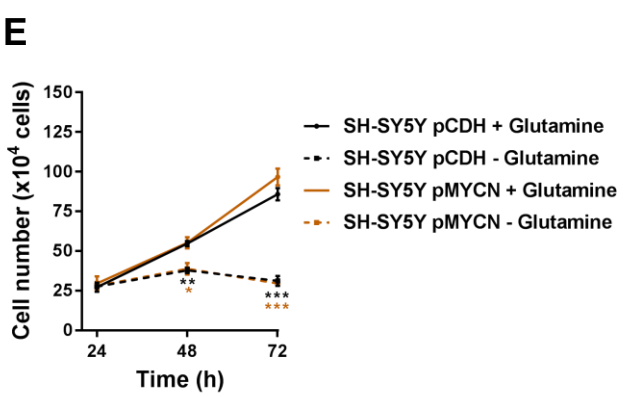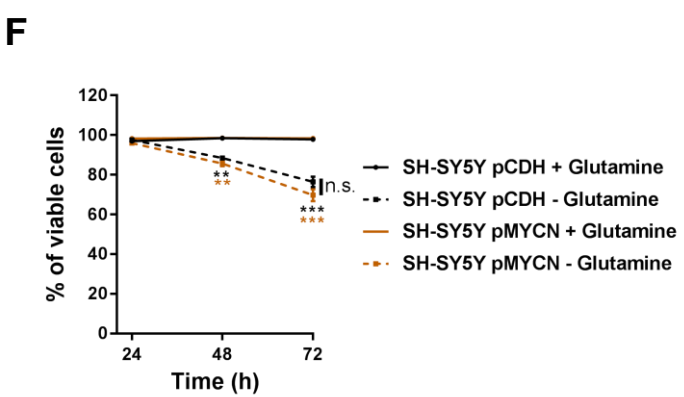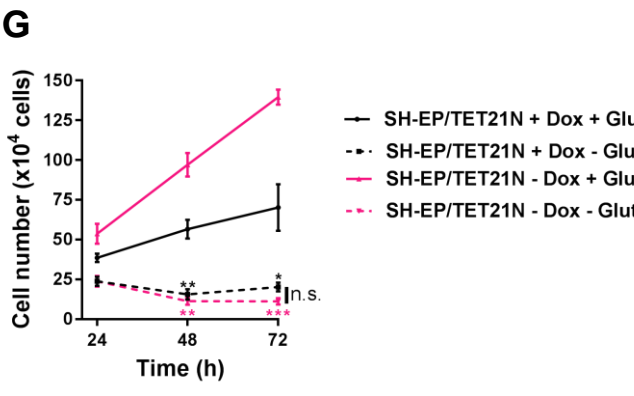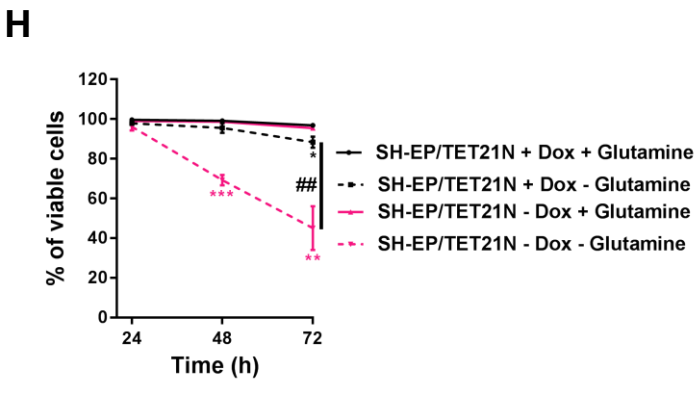

Supplementary Figure 1

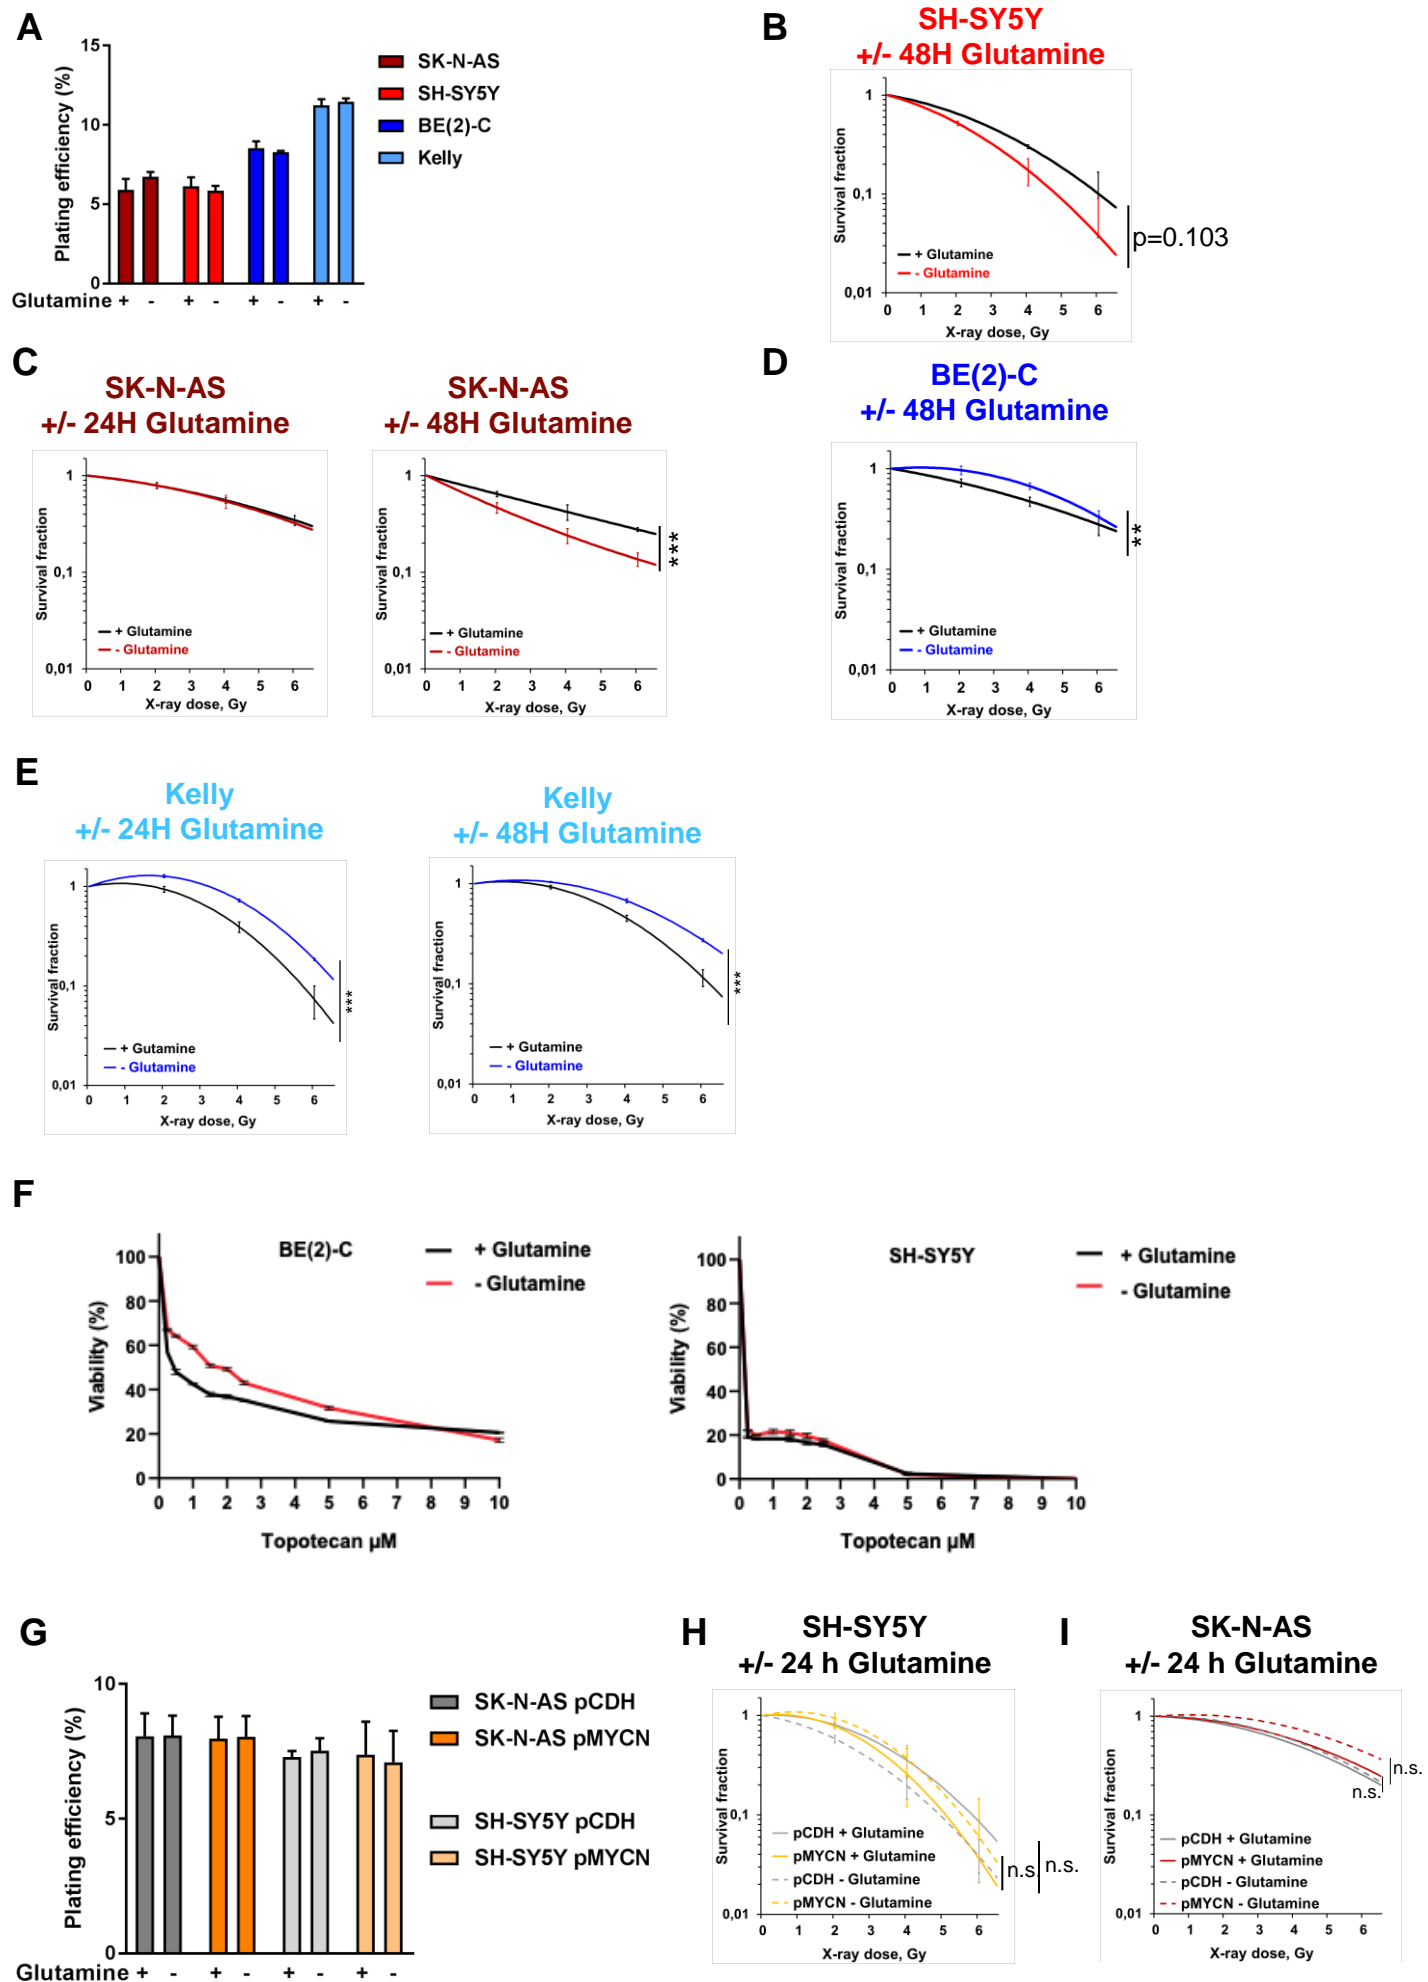

Supplementary Figure 2



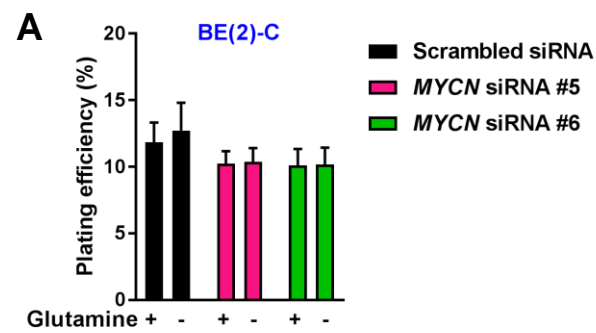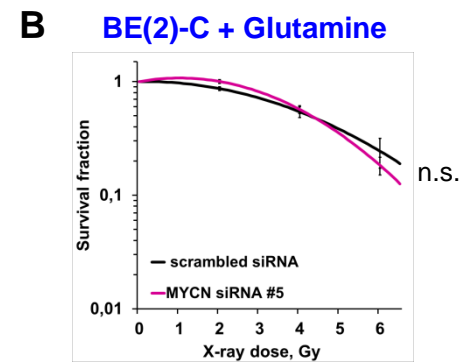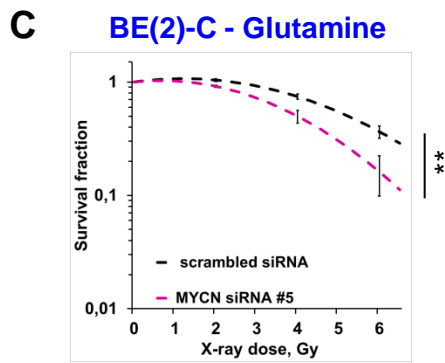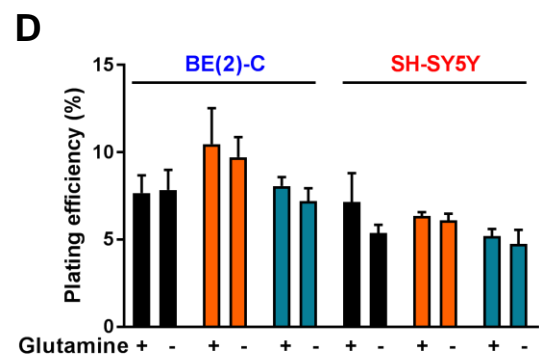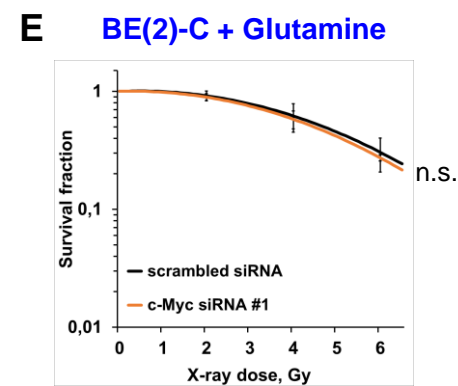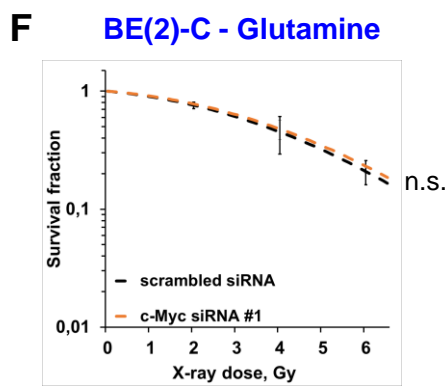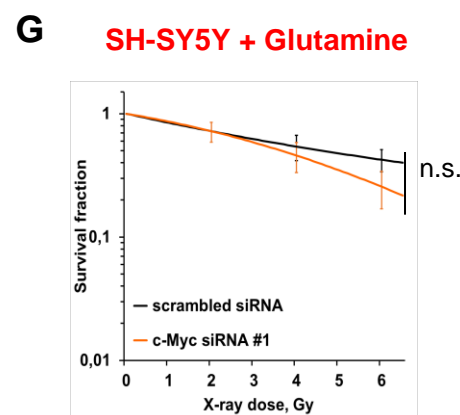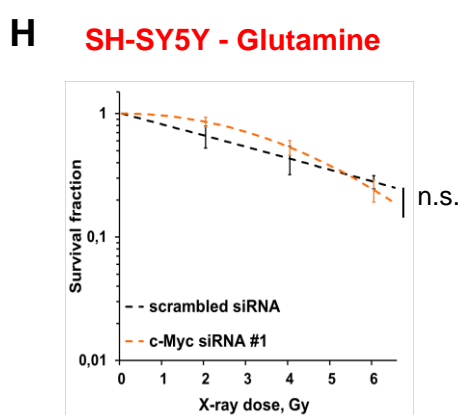

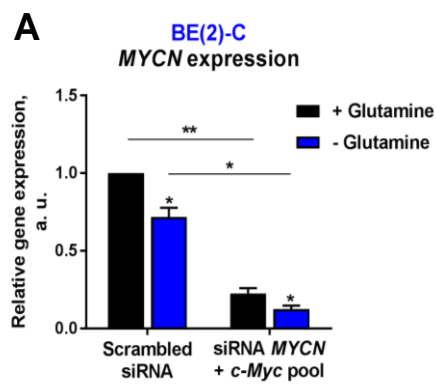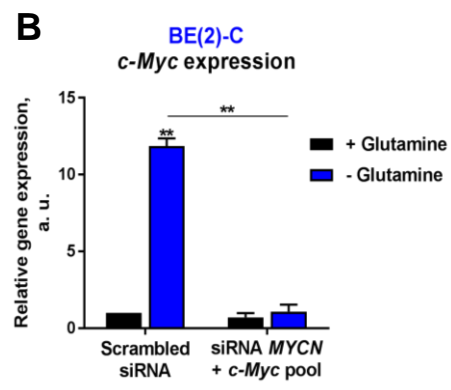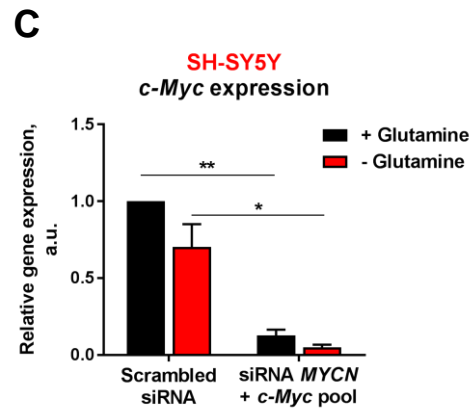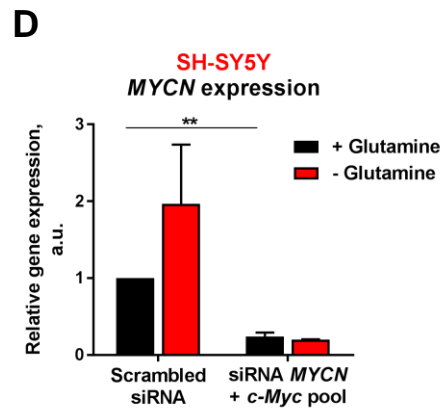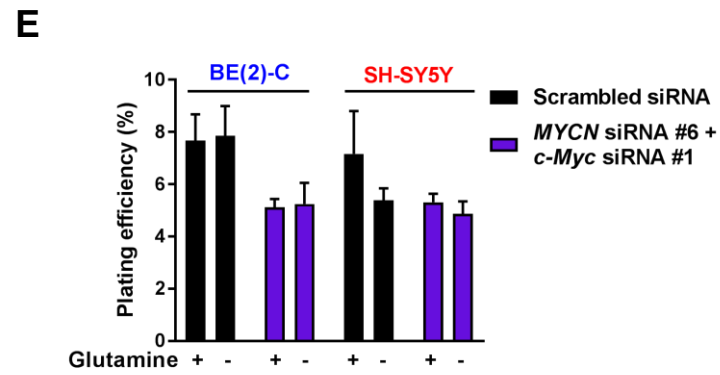

Supplementary Figure 4

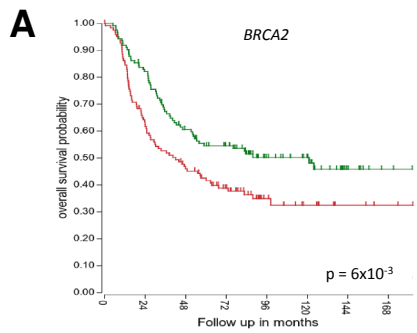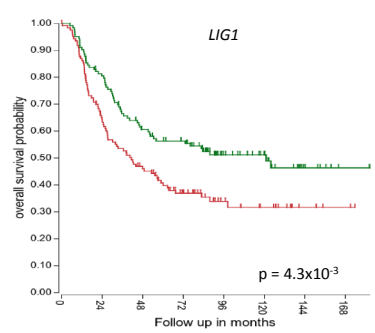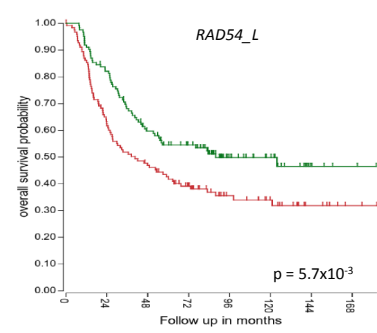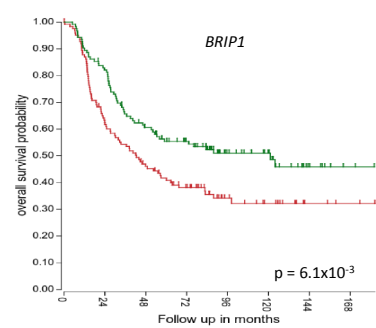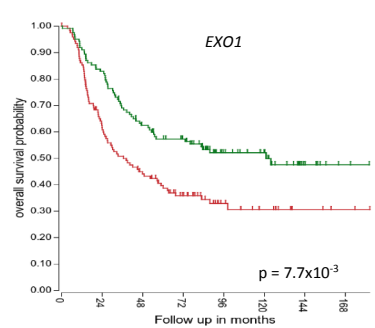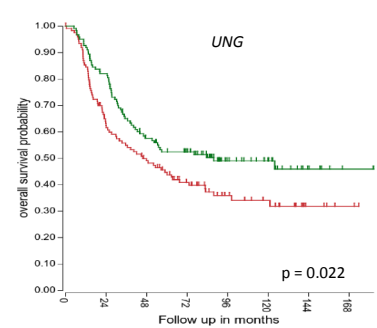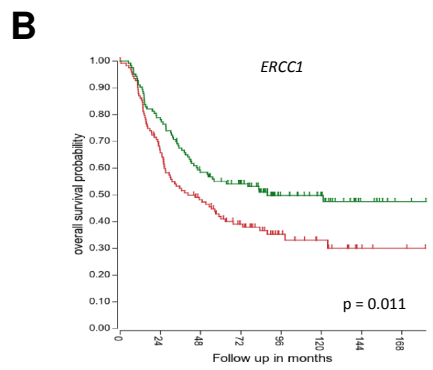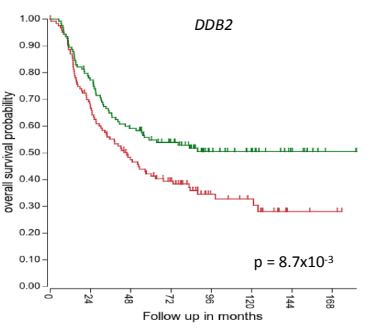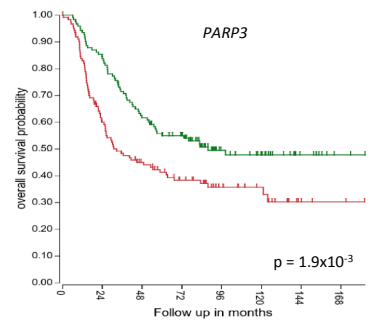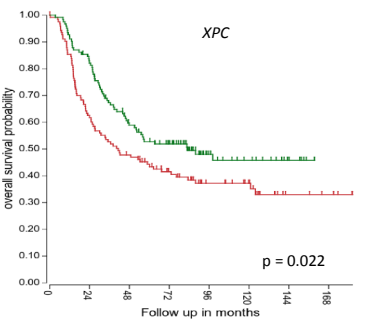

**Supplementary Figure 5**

**A**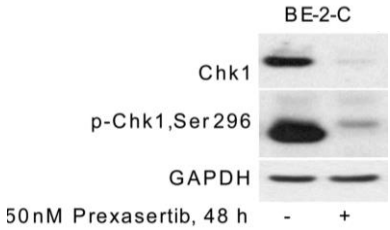**B**

expression level of 8 genes  
in BE(2)-C cells

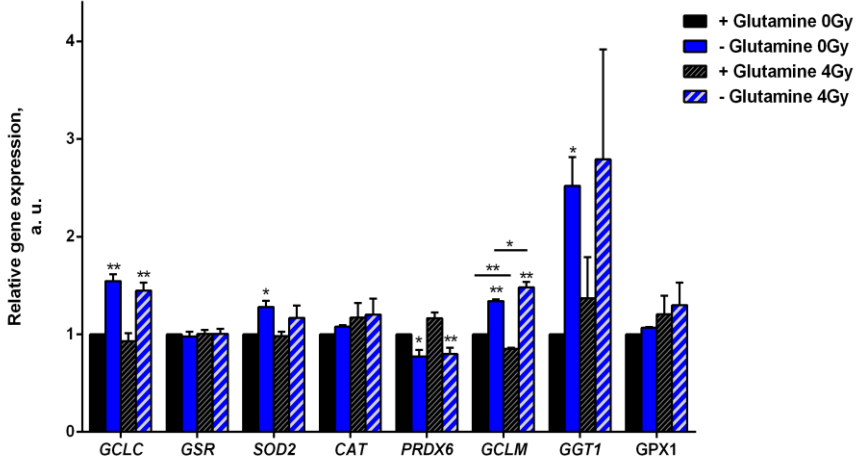**C**

expression level of 8 genes  
in SH-SY5Y cells

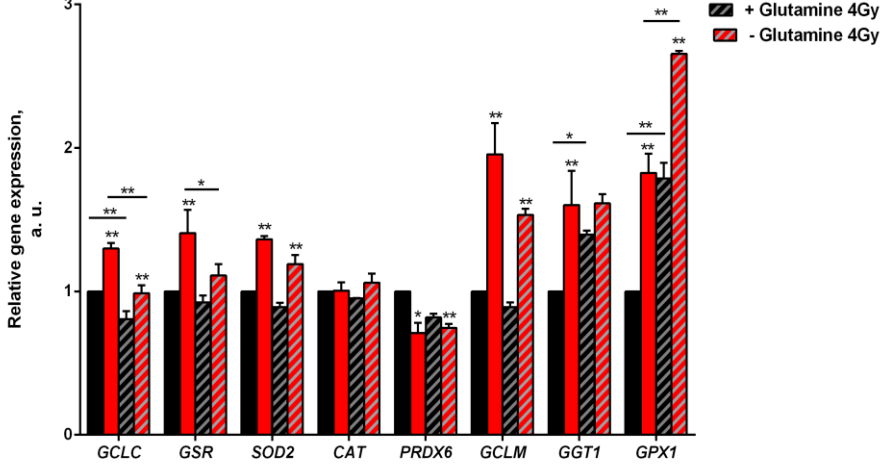**D**

Differences in fold change  
between BE(2)-C & SH-SY5Y cells

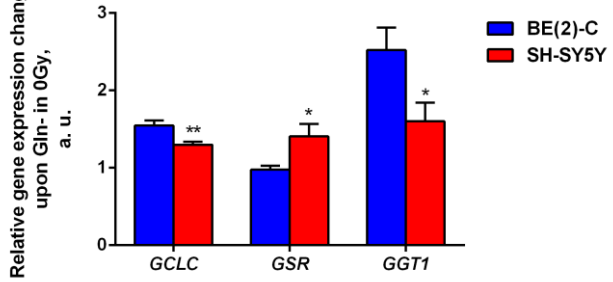

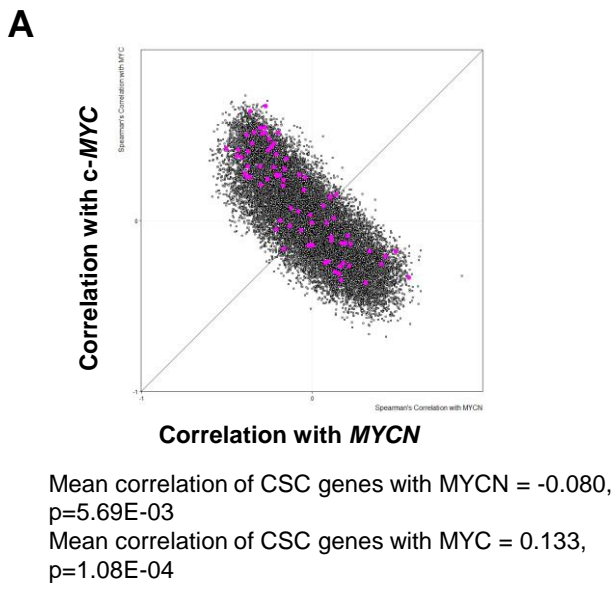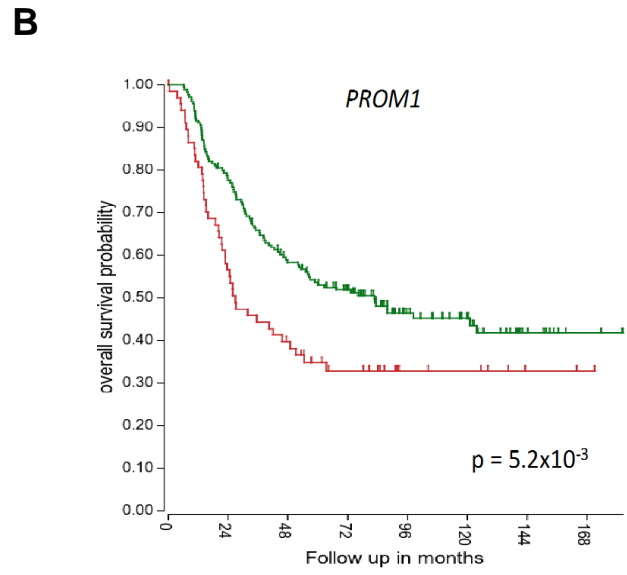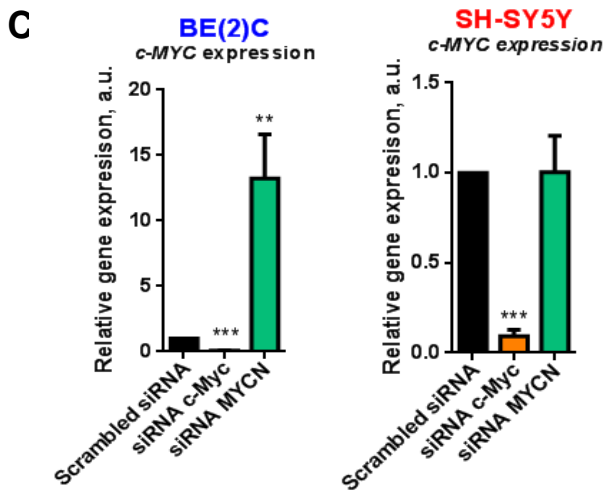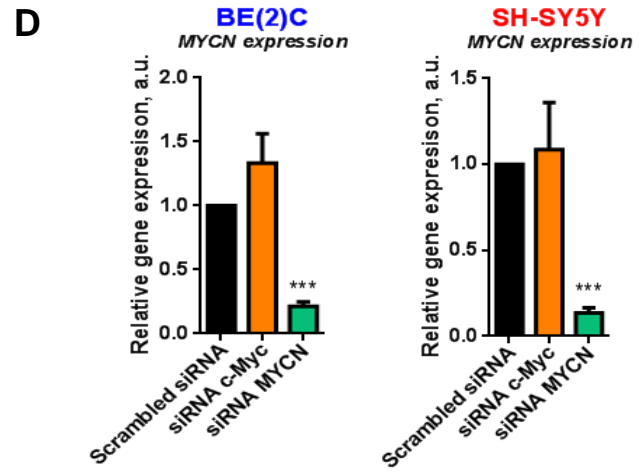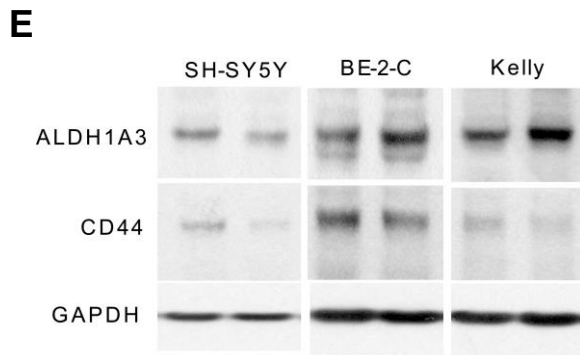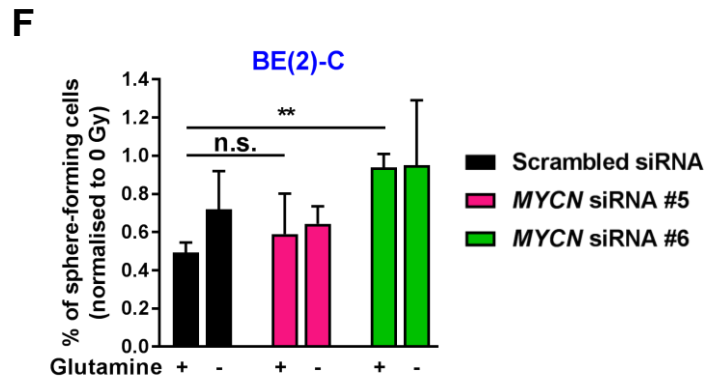

Supplementary Figure 7

**A**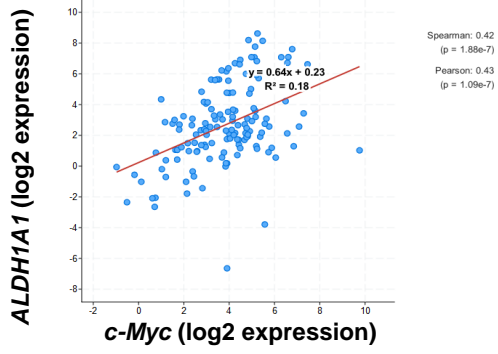**B**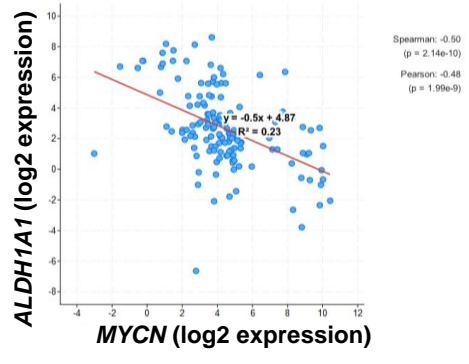**C**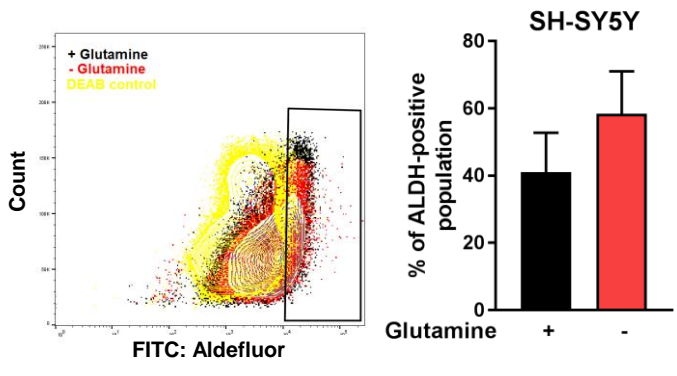

Supplementary Figure 8
